# Supplementary material for: Expanded Electroluminescence in High Load CdS Nanocrystals PVK-Based LEDs
Source: PubMed Central journal article supplement (PMC6780533; doi:10.3390/nano9091212), 2019-08-28
Supplement: nanomaterials-09-01212-s001.pdf [file nanomaterials-09-01212-s001.pdf]

Supporting Information

## Expanded Electroluminescence in High Load CdS Nanocrystals PVK-Based LEDs

Fernando Rodríguez-Mas \*, Juan Carlos Ferrer, José Luis Alonso  
and Susana Fernández de Ávila \*

Communications Engineering Department, Universidad Miguel Hernández, 03202 Elche, Spain

\* Correspondence: s.fdezavila@umh.es (S.F.d.Á.); fernando.rodriguez@umh.es (F.R.-M.);

Tel.: +34-966-658-719 (S.F.d.Á.&F.R.-M.)

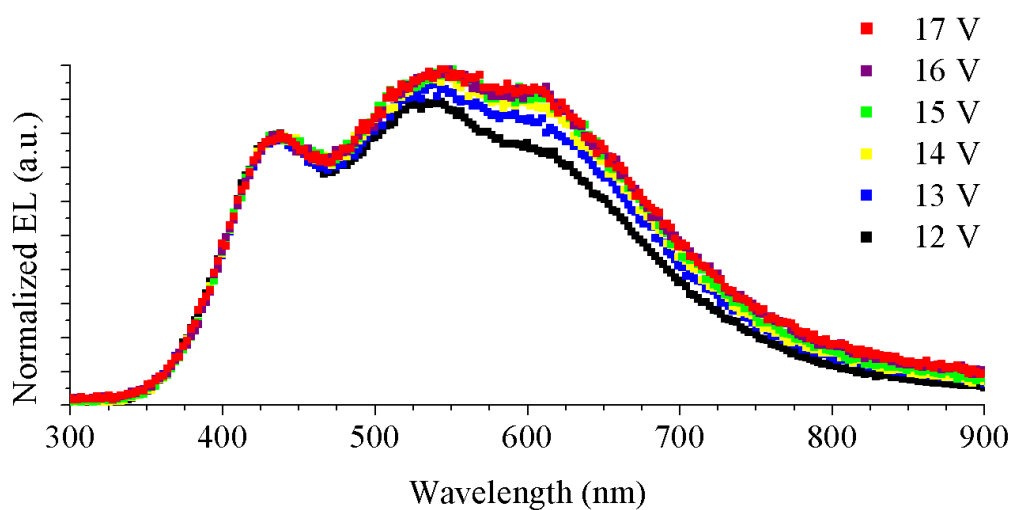

**Figure S1.** Electroluminescent behavior of the hybrid LED with PVK:CdS NCs [1:0.5] as a function of voltage. Voltage increasing from 12 to 17 V.

All spectra have been normalized to the maximum of PVK emission.

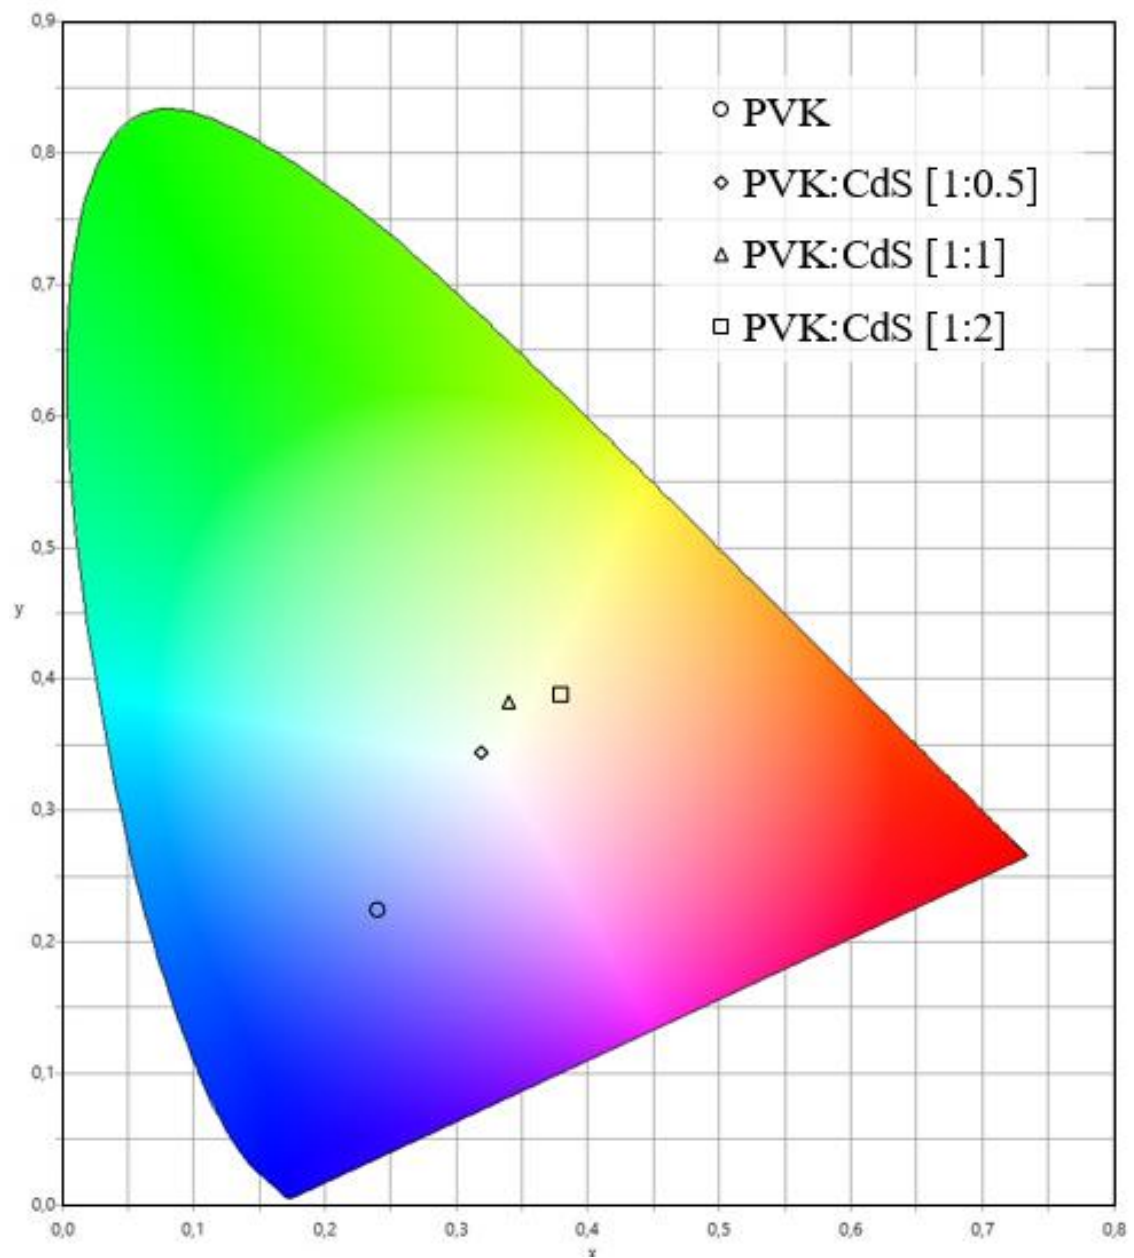

**Figure S2.** CIE coordinates of the hybrid LEDs with increasing CdS content: PVK circle, PVK:CdS [1:0.5] diamond, PVK:CdS [1:1] triangle and PVK:CdS [1:2] square.
